# Supplementary material
Source: PubMed Central journal article supplement (PMC7286348)

## Supplementary Online Content

Rettig EM, Wentz A, Posner MR, et al. Prognostic implication of persistent human papillomavirus type 16 DNA detection in oral rinses for human papillomavirus–related oropharyngeal carcinoma. *JAMA Oncol*. Published online July 30, 2015. doi:10.1001/jamaoncol.2015.2524

**eTable 1.** Characteristics of participants with (“included”) compared to those without (“excluded”) post-treatment oral rinses

**eTable 2.** Characteristics of participants with and without newly detected HR-HPV DNA detected in post-treatment oral rinses

**eTable 3.** HPV16 viral load in oral rinses at diagnosis compared with clinicopathologic characteristics

**eFigure 1.** Timeline of oral rinse results, recurrence and death for participants with persistent oral HPV16 DNA

**eFigure 2.** Survival by HPV16 viral load in oral rinse at diagnosis

This supplementary material has been provided by the authors to give readers additional information about their work.

**eTable 1: Characteristics of participants with (“included”) compared to those without (“excluded”) post-treatment oral rinses.**

| <b>Characteristic</b>            | <b>Included<br/>N(%)</b> | <b>Excluded<br/>N(%)</b> | <b>p-value</b> |
|----------------------------------|--------------------------|--------------------------|----------------|
| <b>Total (N=157)<sup>a</sup></b> | <b>124</b>               | <b>33</b>                |                |
| <b>Age [years; median (IQR)]</b> |                          |                          | <b>0.17</b>    |
|                                  | 56 (50-61)               | 60 (51-66)               |                |
| <b>Gender</b>                    |                          |                          | <b>0.68</b>    |
| Female                           | 12 (10)                  | 4 (12)                   |                |
| Male                             | 112 (90)                 | 29 (88)                  |                |
| <b>Marital status</b>            |                          |                          | <b>0.03</b>    |
| Married/living as married        | 103 (85)                 | 21 (68)                  |                |
| Not married or living as married | 18 (15)                  | 10 (32)                  |                |
| <b>Race</b>                      |                          |                          | <b>0.27</b>    |
| White                            | 117 (98)                 | 29 (94)                  |                |
| Other                            | 3 (3)                    | 2 (6)                    |                |
| <b>Income</b>                    |                          |                          | <b>0.009</b>   |
| <\$50,000                        | 16 (15)                  | 11 (41)                  |                |
| \$50-99,999                      | 36 (33)                  | 7 (26)                   |                |
| ≥\$100,000                       | 58 (53)                  | 9 (33)                   |                |
| <b>Education</b>                 |                          |                          | <b>0.84</b>    |
| High school or less              | 52 (44)                  | 12 (43)                  |                |
| College                          | 47 (40)                  | 10 (36)                  |                |
| Advanced degree                  | 20 (17)                  | 6 (21)                   |                |
| <b>Smoking</b>                   |                          |                          | <b>0.10</b>    |
| Current                          | 13 (11)                  | 6 (20)                   |                |
| Former                           | 38 (31)                  | 13 (43)                  |                |
| Never                            | 70 (58)                  | 11 (37)                  |                |
| <b>Pack-years [median (IQR)]</b> |                          |                          | <b>0.02</b>    |
|                                  | 0 (0-15)                 | 7.5 (0-27)               |                |
| <b>Alcohol use</b>               |                          |                          | <b>0.40</b>    |
| Current                          | 68 (55)                  | 13 (42)                  |                |
| Former                           | 35 (28)                  | 11 (35)                  |                |
| Never                            | 20 (16)                  | 7 (23)                   |                |
| <b>T stage</b>                   |                          |                          | <b>0.08</b>    |
| T1-T2                            | 75 (65)                  | 26 (81)                  |                |
| T3-T4                            | 40 (35)                  | 6 (19)                   |                |
| <b>N stage</b>                   |                          |                          | <b>0.10</b>    |
| N0-N2a                           | 37 (30)                  | 15 (45)                  |                |
| N2b-N3                           | 85 (70)                  | 18 (55)                  |                |
| <b>Overall stage</b>             |                          |                          | <b>0.09</b>    |
| <IV                              | 22 (18)                  | 10 (32)                  |                |
| IV                               | 99 (82)                  | 21 (68)                  |                |

**eTable 1: Characteristics of participants with (“included”) compared to those without (“excluded”) post-treatment oral rinses (continued)**

|                                  |         |         |      |
|----------------------------------|---------|---------|------|
| Oropharynx subsite               |         |         | 0.19 |
| Tonsil                           | 60 (48) | 17 (52) |      |
| Base of tongue                   | 56 (45) | 11 (33) |      |
| Other oropharynx                 | 8 (6)   | 5 (15)  |      |
| Treatment                        |         |         | 0.07 |
| Radiation-based                  | 78 (64) | 13 (45) |      |
| Surgery-based                    | 45 (37) | 16 (55) |      |
| HPV16 in oral rinse at diagnosis |         |         | 0.96 |
| No                               | 57 (46) | 15 (45) |      |
| Yes                              | 67 (54) | 18 (55) |      |

Abbreviations: IQR, interquartile range; HPV, human papillomavirus

<sup>a</sup>Total number of participants in original study cohort.

**eTable 2: Characteristics of participants with and without newly detected HR-HPV DNA detected in post-treatment oral rinses.**

|                               | <b>No newly detected<br/>HR-HPV DNA<br/>post-treatment<br/>N=111<br/>N (%)</b> | <b>Newly detected<br/>HR-HPV DNA<br/>post-treatment<sup>a</sup><br/>N=13<br/>N (%)</b> | <b>p-value</b> |
|-------------------------------|--------------------------------------------------------------------------------|----------------------------------------------------------------------------------------|----------------|
| <b>Age, continuous</b>        |                                                                                |                                                                                        | 0.49           |
| Years [median (IQR)]          | 56 (50-62)                                                                     | 53 (51-57)                                                                             |                |
| <b>Gender</b>                 |                                                                                |                                                                                        | 0.80           |
| Female                        | 11 (10)                                                                        | 1 (8)                                                                                  |                |
| Male                          | 100 (90)                                                                       | 12 (92)                                                                                |                |
| <b>Marital status</b>         |                                                                                |                                                                                        | 0.09           |
| Married/living as married     | 94 (87)                                                                        | 9 (70)                                                                                 |                |
| Not married/living as married | 14 (13)                                                                        | 4 (30)                                                                                 |                |
| <b>Race</b>                   |                                                                                |                                                                                        | 0.20           |
| White                         | 105 (98)                                                                       | 12 (92)                                                                                |                |
| Other                         | 2 (2)                                                                          | 1 (8)                                                                                  |                |
| <b>Education</b>              |                                                                                |                                                                                        | 0.98           |
| High school or less           | 46 (43)                                                                        | 6 (46)                                                                                 |                |
| College                       | 42 (40)                                                                        | 5 (38)                                                                                 |                |
| Advanced degree               | 18 (17)                                                                        | 2 (15)                                                                                 |                |
| <b>Income</b>                 |                                                                                |                                                                                        | 0.12           |
| <\$50,000                     | 12 (12)                                                                        | 4 (33)                                                                                 |                |
| \$50-99,999                   | 32 (33)                                                                        | 4 (33)                                                                                 |                |
| ≥\$100,000                    | 54 (55)                                                                        | 4 (33)                                                                                 |                |
| <b>Smoking status</b>         |                                                                                |                                                                                        | 0.18           |
| Current smoker                | 10 (9)                                                                         | 3 (25)                                                                                 |                |
| Former smoker                 | 36 (33)                                                                        | 2 (17)                                                                                 |                |
| Never smoker                  | 63 (58)                                                                        | 7 (58)                                                                                 |                |
| <b>Pack-years, continuous</b> |                                                                                |                                                                                        | 0.98           |
| Pack-years/10 [median (IQR)]  | 0 (0-15)                                                                       | 0 (0-12)                                                                               |                |
| <b>Alcohol use</b>            |                                                                                |                                                                                        | 0.09           |
| Current                       | 64 (58)                                                                        | 4 (31)                                                                                 |                |
| Former                        | 28 (25)                                                                        | 7 (54)                                                                                 |                |
| Never                         | 18 (16)                                                                        | 2 (15)                                                                                 |                |
| <b>N stage</b>                |                                                                                |                                                                                        | 0.97           |
| N0, N1, N2a                   | 33 (30)                                                                        | 4 (31)                                                                                 |                |
| N2b-N3                        | 76 (70)                                                                        | 9 (69)                                                                                 |                |
| <b>T stage</b>                |                                                                                |                                                                                        | 0.45           |
| T1-T2                         | 66 (64)                                                                        | 9 (75)                                                                                 |                |
| T3-T4                         | 37 (36)                                                                        | 3 (25)                                                                                 |                |

**eTable 2: Characteristics of participants with and without newly detected HR-HPV DNA detected in post-treatment oral rinses (continued).**

|                                       |         |          |      |
|---------------------------------------|---------|----------|------|
| Overall stage                         |         |          | 0.21 |
| <IV                                   | 18 (17) | 4 (31)   |      |
| IV                                    | 90 (83) | 9 (69)   |      |
| Oropharynx subsite                    |         |          | 0.38 |
| Tonsil                                | 54 (49) | 6 (46)   |      |
| Base of tongue                        | 51 (46) | 5 (38)   |      |
| Other oropharynx                      | 6 (5)   | 2 (15)   |      |
| Treatment                             |         |          | 0.29 |
| Radiation-based                       | 68 (62) | 10 (77)  |      |
| Surgery-based                         | 42 (38) | 3 (23)   |      |
| Any HR-HPV in oral rinse at diagnosis |         |          | 0.32 |
| No                                    | 41 (37) | 3 (23)   |      |
| Yes                                   | 70 (63) | 10 (77)  |      |
| HPV16 in oral rinse at diagnosis      |         |          | 0.99 |
| No                                    | 51 (46) | 6 (46)   |      |
| Yes                                   | 60 (54) | 7 (54)   |      |
| Lifetime oral sex partners            |         |          | 0.17 |
| 0-5 oral sex partners                 | 45 (43) | 3 (23)   |      |
| >5 oral sex partners                  | 60 (57) | 10 (77)  |      |
| Recent oral sex                       |         |          | 0.90 |
| None                                  | 59 (63) | 7 (70)   |      |
| Any                                   | 35 (37) | 3 (30)   |      |
| Current smoker at any follow-up visit |         |          | 0.64 |
| No                                    | 98 (98) | 11 (100) |      |
| Yes                                   | 2 (2)   | 0 (0)    |      |

Abbreviations: IQR, interquartile range; HR-HPV, high-risk human papillomavirus

<sup>a</sup>Includes one participant with newly detected HPV16 DNA and 12 participants with newly detected non-HPV16 HR-HPV DNA in post-treatment oral rinses.

**eTable 3: HPV16 viral load in oral rinses at diagnosis compared with clinicopathologic characteristics.**

|                               | <b>Median detectable viral load (n=57)<sup>a</sup><br/>Median (IQR)</b> | <b>Undetectable<br/>N(%)</b> | <b>Low<br/>N(%)</b> | <b>High<br/>N(%)</b> | <b>p-value</b> |
|-------------------------------|-------------------------------------------------------------------------|------------------------------|---------------------|----------------------|----------------|
| <b>Overall</b>                |                                                                         |                              |                     |                      |                |
|                               | 161 (21-846)                                                            | 64 (53)                      | 28 (23)             | 29 (24)              |                |
| <b>Age (years)</b>            |                                                                         |                              |                     |                      | 0.36           |
| <50                           | 316 (59-981)                                                            | 17 (55)                      | 5 (16)              | 9 (29)               |                |
| 50-55                         | 251 (33-1250)                                                           | 16 (59)                      | 4 (15)              | 7 (26)               |                |
| 55-60                         | 43 (21-265)                                                             | 19 (59)                      | 8 (25)              | 5 (16)               |                |
| >60                           | 73 (8-697)                                                              | 12 (39)                      | 11 (35)             | 8 (26)               |                |
| <b>Gender</b>                 |                                                                         |                              |                     |                      | 0.69           |
| Female                        | 1445 (8-2050)                                                           | 6 (50)                       | 2 (17)              | 4 (33)               |                |
| Male                          | 150 (21-530)                                                            | 58 (53)                      | 26 (24)             | 25 (23)              |                |
| <b>Marital status</b>         |                                                                         |                              |                     |                      | 0.37           |
| Married/living as married     | 117 (19-500)                                                            | 52 (52)                      | 25 (25)             | 23 (23)              |                |
| Not married/living as married | 1620 (276-2720)                                                         | 10 (56)                      | 2 (11)              | 6 (33)               |                |
| <b>Education</b>              |                                                                         |                              |                     |                      | 0.82           |
| High school or less           | 203 (26-1250)                                                           | 29 (56)                      | 11 (21)             | 12 (23)              |                |
| College or advanced degree    | 155 (12-614)                                                            | 32 (50)                      | 16 (25)             | 16 (25)              |                |
| <b>Income</b>                 |                                                                         |                              |                     |                      | 0.58           |
| <\$100,000                    | 470 (26-2050)                                                           | 29 (56)                      | 10 (19)             | 13 (25)              |                |
| ≥\$100,000                    | 79 (17-316)                                                             | 29 (53)                      | 15 (27)             | 11 (20)              |                |
| <b>Smoking status</b>         |                                                                         |                              |                     |                      | 0.04           |
| Never/former smoker           | 79 (17-530)                                                             | 55 (52)                      | 28 (27)             | 22 (21)              |                |
| Current smoker                | 914 (285-1250)                                                          | 7 (54)                       | 0 (0)               | 6 (46)               |                |
| <b>Alcohol use</b>            |                                                                         |                              |                     |                      | 0.25           |
| Current                       | 258 (21-697)                                                            | 35 (54)                      | 11 (17)             | 19 (29)              |                |
| Former                        | 139 (17-1250)                                                           | 16 (46)                      | 11 (31)             | 8 (23)               |                |
| Never                         | 42 (6-528)                                                              | 12 (60)                      | 6 (30)              | 2 (10)               |                |
| <b>N stage</b>                |                                                                         |                              |                     |                      | 0.76           |
| N0, N1, N2a                   | 112 (21-316)                                                            | 18 (50)                      | 10 (28)             | 8 (22)               |                |
| N2b-N3                        | 178 (20-1310)                                                           | 44 (53)                      | 18 (22)             | 21 (26)              |                |
| <b>T stage</b>                |                                                                         |                              |                     |                      | 0.14           |
| T1-T2                         | 161 (21-530)                                                            | 41 (57)                      | 15 (21)             | 16 (22)              |                |
| T3-T4                         | 150 (17-1830)                                                           | 15 (38)                      | 13 (33)             | 12 (30)              |                |
| <b>Overall stage</b>          |                                                                         |                              |                     |                      | 0.36           |
| <IV                           | 150 (25-470)                                                            | 8 (38)                       | 7 (33)              | 6 (29)               |                |
| IV                            | 169 (21-1116)                                                           | 5 (55)                       | 21 (22)             | 23 (24)              |                |

**eTable 3: HPV16 viral load in oral rinses at diagnosis compared with clinicopathologic characteristics (continued).**

|                                                                        |                         |         |         |         |        |
|------------------------------------------------------------------------|-------------------------|---------|---------|---------|--------|
| Oropharynx subsite                                                     |                         |         |         |         | <0.001 |
| Tonsil                                                                 | 412 (178-1250)          | 28 (49) | 7 (12)  | 22 (39) |        |
| Base of tongue/other oropharynx                                        | 24 (7-150)              | 36 (56) | 21 (33) | 7 (11)  |        |
| Treatment                                                              |                         |         |         |         | 0.57   |
| Radiation-based                                                        | 74 (16-1830)            | 39 (51) | 20 (26) | 17 (22) |        |
| Surgery-based                                                          | 200 (66-471)            | 24 (55) | 8 (19)  | 12 (27) |        |
| Lifetime oral sex partners                                             |                         |         |         |         | 0.15   |
| 0-5 oral sex partners                                                  | 150 (11-846)            | 29 (63) | 9 (20)  | 8 (17)  |        |
| >5 oral sex partners                                                   | 179 (24-697)            | 31 (45) | 18 (26) | 20 (29) |        |
| Lifetime vaginal sex partners                                          |                         |         |         |         | 0.88   |
| 1-5 vaginal sex partners                                               | 24 (5-316)              | 13 (54) | 6 (25)  | 5 (21)  |        |
| >5 vaginal sex partners                                                | 179 (23-903)            | 45 (51) | 27 (24) | 28 (25) |        |
| Age at oral sex initiation                                             |                         |         |         |         | 0.38   |
| <13                                                                    | 285 (161-959)           | 11 (55) | 2 (10)  | 7 (35)  |        |
| 13-14                                                                  | 144 (17-846)            | 37 (49) | 20 (27) | 18 (24) |        |
| >14 or never                                                           | 51 (15-258)             | 13 (62) | 5 (24)  | 3 (14)  |        |
| HPV16 DNA detected in oral rinse at diagnosis (lineblot hybridization) |                         |         |         |         | <0.001 |
| No                                                                     | 150 (N/A <sup>b</sup> ) | 54 (98) | 1 (2)   | 0 (0)   |        |
| Yes                                                                    | 169 (21-903)            | 10 (15) | 27 (41) | 29 (44) |        |
| Persistent HPV16 in oral rinse                                         |                         |         |         |         | 0.32   |
| No                                                                     | 161 (21-697)            | 63 (54) | 26 (22) | 27 (23) |        |
| Yes                                                                    | 631 (7-1540)            | 1 (20)  | 2 (40)  | 2 (40)  |        |

Abbreviations: IQR, interquartile range; HPV, human papillomavirus

<sup>a</sup>Data from the 57 participants with detectable viral load were included in the median values displayed in this column.

<sup>b</sup>Only one participant without HPV16 DNA detected in oral rinse at diagnosis had a detectable HPV16 viral load.

**eFigure 1: Timeline of oral rinse results, recurrence and death for participants with persistent oral HPV16 DNA.**

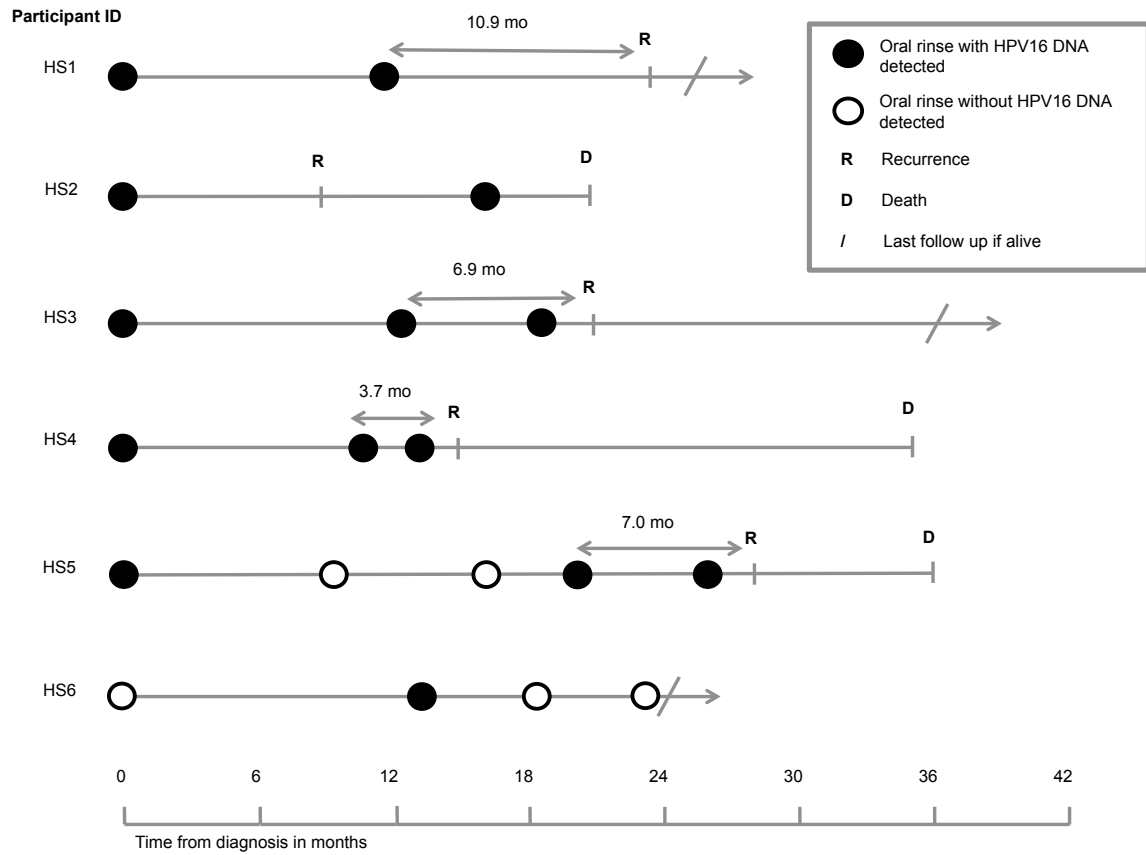

Abbreviations: HPV, human papillomavirus; mo, months



**eFigure 2: Survival by HPV16 viral load in oral rinse at diagnosis**

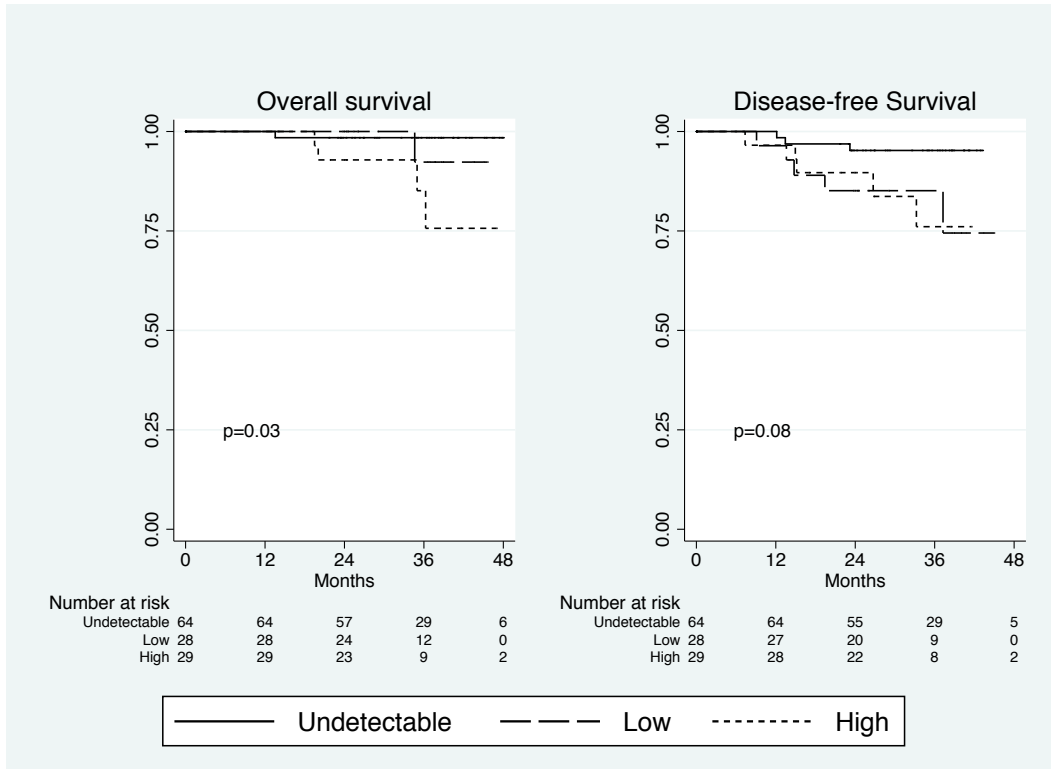

Supplement: NIHMS1590668-supplement-3_Tables_and_2_Figures.pdf [file NIHMS1590668-supplement-3_Tables_and_2_Figures.pdf]
